# Supplementary material
Source: HighWire-hosted journal article supplement (https://sti.bmj.com/content/94/1/55)
Supplement: inline-supplementary-material-2 [file inline-supplementary-material-2.pdf]

Table S2: Selected demographic and sexual health characteristics among HIV-negative young South African women (n=388) with and without HPV<sup>a</sup> infection

|                                                                              | HPV <sup>a</sup> |               | p value <sup>b</sup> |
|------------------------------------------------------------------------------|------------------|---------------|----------------------|
|                                                                              | Yes<br>(n=277)   | No<br>(n=111) |                      |
| Median age in years (range)                                                  | 20 (16-24)       | 20 (16-24)    | 0.38                 |
| 16-18                                                                        | 63 (22.7)        | 19 (17.1)     |                      |
| 19-21                                                                        | 132 (47.6)       | 59 (53.1)     |                      |
| 22-24                                                                        | 82 (29.6)        | 33 (29.7)     |                      |
| Marital status                                                               |                  |               | 0.02                 |
| Single/Widowed                                                               | 269 (97.11)      | 102 (91.8)    |                      |
| Married/Living Together                                                      | 8 (2.89)         | 9 (8.11)      |                      |
| Education                                                                    |                  |               | 0.16                 |
| ≤ Grade 7                                                                    | 11 (3.9)         | 8 (7.2)       |                      |
| Grade 8-12                                                                   | 156 (56.3)       | 56 (50.4)     |                      |
| Passed Grade 12                                                              | 50 (18.0)        | 28 (25.2)     |                      |
| Some college/tech                                                            | 60 (21.6)        | 19 (17.1)     |                      |
| ≥1 alcohol drink in past month                                               | 106 (58.8)       | 27 (55.1)     | 0.86                 |
| Ever used tobacco <sup>c</sup>                                               | 51 (18.4)        | 20 (18.0)     | 0.92                 |
| Median age of first vaginal sex (range)                                      | 17 (1-21)        | 16 (1-19)     | 0.13                 |
| Prior history of STI                                                         |                  |               | 0.30                 |
| Yes                                                                          | 67 (24.1)        | 21 (18.9)     |                      |
| No                                                                           | 146 (52.7)       | 68 (61.26)    |                      |
| Don't Know                                                                   | 64 (23.1)        | 22 (19.8)     |                      |
| Sexual partner with an STI <sup>d</sup>                                      | 43 (15.5)        | 12 (10.8)     | 0.22                 |
| Currently using birth control <sup>e</sup>                                   | 128 (46.2)       | 56 (50.4)     | 0.62                 |
| Current birth control use                                                    |                  |               |                      |
| Oral contraceptives                                                          | 10 (3.6)         | 4 (3.6)       | 0.99                 |
| IUD/loop/coil                                                                | 2 (0.7)          | 0 (0.0)       | 0.36                 |
| Depo Provera                                                                 | 67 (24.1)        | 32 (28.8)     | 0.34                 |
| Condoms                                                                      | 62 (22.3)        | 30 (27.0)     | 0.33                 |
| Ever been pregnant                                                           | 131 (47.2)       | 61 (54.9)     | 0.17                 |
| Lifetime no. of male sexual partners <sup>f</sup> ; median (range)           | 3 (1-22)         | 2 (1-24)      | 0.54                 |
| 1                                                                            | 38 (17.3)        | 17 (22.6)     |                      |
| 2                                                                            | 61 (27.8)        | 26 (34.6)     |                      |
| 3+                                                                           | 120 (54.7)       | 32 (42.6)     |                      |
| Number of sexual partners in the past 6 months <sup>g</sup> ; median (range) | 1 (0-5)          | 1 (0-4)       | 0.12                 |
| 0                                                                            | 9 (5.4)          | 7 (12.0)      |                      |
| 1                                                                            | 123 (74.1)       | 43 (74.1)     |                      |
| 2+                                                                           | 34 (20.4)        | 8 (13.7)      |                      |
| Ever received money/drugs/ presents for sex                                  | 9 (3.2)          | 4 (3.2)       | 0.86                 |

<sup>a</sup>Included HPV types known to cause disease, specifically genital warts (HPV 6, 11) and cervical cancer (HPV 16, 18, 31, 33, 35, 39, 45, 51, 52, 56, 58, 59, 68)

<sup>b</sup>Pearson Chi square test for categorical variables and Mann-Whitney test for continuous variables

<sup>c</sup>Tobacco- cigarettes, roll-ups, pipes, cigars, chew, snuff

<sup>d</sup>Data based on self-report

<sup>e</sup>Sample size reduced to n=254 due to missing values

<sup>f</sup>Sample size reduced to n=294 due to missing values

<sup>g</sup>Sample size reduced to n=224 due to missing values

<sup>f,g</sup>Participants misreported not having vaginal intercourse in the enrollment questionnaire because of confusion related to the term “vaginal”
